# Supplementary material for: Taxonomic revision of the genus Cranichis (Orchidaceae, Cranichideae) in Colombia
Source: PeerJ. 2019 Aug 9;7:e7385. doi: 10.7717/peerj.7385 (PMC6690379; doi:10.7717/peerj.7385)
Supplement: Supplemental Information 1 [file peerj-07-7385-s001.xlsx]

## Sheet: Arkusz1
Species	Alt min	Alt max
Cranichis atrata	2000	2900
Cranichis callejasii	3120	3125
Cranichis mandonii	3000	3200
Cranichis pleioneura	2500	3600
Cranichis betancurii	2140	2145
Cranichis schultesii	1600	1800
Cranichis antioquiensis	1500	3300
Cranichis barkleyi	2600	3100
Cranichis ciliata	750	3000
Cranichis killipii	2600	3000
Cranichis zarucchii	1750	3200
Cranichis badia	2700	3200
Cranichis juajibioyi	3150	3155
Cranichis neglecta	2200	3000
Cranichis pennelli	2700	3000
Cranichis rotundifolia	2700	2705
Cranichis silvicola	1750	3300
Cranichis brevirostris	3000	3500
Cranichis calva	2800	3000
Cranichis longipetiolata	1400	2200
Cranichis polyantha	2000	3200
Cranichis brachyblephara	3000	3005
Cranichis polyblephara	1600	1900
Cranichis popayánensis	2300	2500
Cranichis cristalinensis	3200	3205
Cranichis cylindrostachys	1500	1505
Cranichis diphylla	1300	3000
Cranichis fendleri	1300	3300
Cranichis lehmannii	1000	2360
Cranichis monophylla	2200	2500
Cranichis muscosa	800	2800
Cranichis nigrescens	2500	3300
Cranichis ovatilabia	2500	2505
Cranichis parvula	500	2000
Cranichis pseudomuscosa	2200	3150
Cranichis queremalensis	1430	1550
Cranichis schlimii	2800	2805
Cranichis stictophylla	2000	2700
Cranichis schlechteri	1200	1300
Cranichis viereckii	1200	2420
Cranichis wageneri	2050	2810
Cranichis pulvinifera	2200	2205

## Sheet: Arkusz2
Species	Alt min	Alt max		Difference
Cranichis parvula	500	2000		1500
Cranichis ciliata	750	3000		2250
Cranichis muscosa	800	2800		2000
Cranichis lehmannii	1000	2360		1360
Cranichis schlechteri	1200	1300		100
Cranichis viereckii	1200	2420		1220
Cranichis diphylla	1300	3000		1700
Cranichis fendleri	1300	3300		2000
Cranichis longipetiolata	1400	2200		800
Cranichis queremalensis	1430	1550		120
Cranichis cylindrostachys	1500	1505		5
Cranichis antioquiensis	1500	3300		1800
Cranichis schultesii	1600	1800		200
Cranichis polyblephara	1600	1900		300
Cranichis zarucchii	1750	3200		1450
Cranichis silvicola	1750	3300		1550
Cranichis stictophylla	2000	2700		700
Cranichis atrata	2000	2900		900
Cranichis polyantha	2000	3200		1200
Cranichis wageneri	2050	2810		760
Cranichis betancurii	2140	2145		5
Cranichis pulvinifera	2200	2205		5
Cranichis monophylla	2200	2500		300
Cranichis neglecta	2200	3000		800
Cranichis pseudomuscosa	2200	3150		950
Cranichis popayánensis	2300	2500		200
Cranichis ovatilabia	2500	2505		5
Cranichis nigrescens	2500	3300		800
Cranichis pleioneura	2500	3600		1100
Cranichis killipii	2600	3000		400
Cranichis barkleyi	2600	3100		500
Cranichis rotundifolia	2700	2705		5
Cranichis pennelli	2700	3000		300
Cranichis badia	2700	3200		500
Cranichis schlimii	2800	2805		5
Cranichis calva	2800	3000		200
Cranichis brachyblephara	3000	3005		5
Cranichis mandonii	3000	3200		200
Cranichis brevirostris	3000	3500		500
Cranichis callejasii	3120	3125		5
Cranichis juajibioyi	3150	3155		5
Cranichis cristalinensis	3200	3205		5
