# Supplementary material for: Taxonomic revision of the genus Cranichis (Orchidaceae, Cranichideae) in Colombia
Source: PeerJ. 2019 Aug 9;7:e7385. doi: 10.7717/peerj.7385 (PMC6690379; doi:10.7717/peerj.7385)
Supplement: Supplemental Information 2 [file peerj-07-7385-s002.xlsx]

## Sheet: EcoregionsWWF
Species	x	y	ECO_NAME
C. antioquiensis	2.43414	-76.4864	Cauca Valley montane forests
C. antioquiensis	2.368	-76.4479	Cauca Valley montane forests
C. antioquiensis	2.62786	-76.5001	Cauca Valley montane forests
C. antioquiensis	2.94106	-76.771	Cauca Valley montane forests
C. antioquiensis	3.54492	-76.1139	Cauca Valley montane forests
C. antioquiensis	7.37047	-72.4779	Cordillera Oriental montane forests
C. antioquiensis	0.662194	-77.5356	Eastern Cordillera real montane forests
C. antioquiensis	1.22642	-76.9201	Eastern Cordillera real montane forests
C. antioquiensis	5.29504	-75.2499	Magdalena Valley montane forests
C. antioquiensis	4.93449	-73.8336	Magdalena Valley montane forests
C. antioquiensis	5	-74.15	Magdalena Valley montane forests
C. antioquiensis	4.90872	-73.9478	Magdalena Valley montane forests
C. antioquiensis	5.03786	-73.9849	Magdalena Valley montane forests
C. antioquiensis	5.17247	-73.9621	Magdalena Valley montane forests
C. antioquiensis	5.17247	-73.9621	Magdalena Valley montane forests
C. antioquiensis	4.66841	-74.0297	Magdalena Valley montane forests
C. antioquiensis	7.00052	-73.0728	Magdalena Valley montane forests
C. antioquiensis	5.75472	-73.4372	Northern Andean páramo
C. antioquiensis	5.0023	-73.71	Northern Andean páramo
C. antioquiensis	1.3605	-77.2917	Northwestern Andean montane forests
C. antioquiensis	1.09461	-77.3942	Northwestern Andean montane forests
C. antioquiensis	10.7051	-73.4979	Santa Marta montane forests
C. atrata	7.35242	-72.5769	Cordillera Oriental montane forests
C. atrata	1.17611	-76.8757	Eastern Cordillera real montane forests
C. atrata	1.20246	-76.9565	Eastern Cordillera real montane forests
C. atrata	6.18053	-75.4656	Magdalena Valley montane forests
C. atrata	5.85939	-73.9651	Magdalena Valley montane forests
C. atrata	7.36639	-72.984	Magdalena Valley montane forests
C. atrata	1.20583	-77.2858	Northwestern Andean montane forests
C. badia	4.66841	-74.0297	Magdalena Valley montane forests
C. badia	4.33333	-74.25	Magdalena Valley montane forests
C. badia	4.66841	-74.0297	Magdalena Valley montane forests
C. badia	4.77936	-74.0205	Magdalena Valley montane forests
C. badia	1.20583	-77.2858	Northwestern Andean montane forests
C. barkleyi	6.50562	-75.9155	Cauca Valley montane forests
C. barkleyi	2.36801	-76.4479	Cauca Valley montane forests
C. barkleyi	4.77936	-74.0205	Magdalena Valley montane forests
C. betancurii	5.53	-75.6782	Cauca Valley montane forests
C. callejasii	6.45	-76.7667	Chocó-Darién moist forests
C. calva	1.12972	-77.1493	Eastern Cordillera real montane forests
C. calva	1.2175	-77.3341	Northwestern Andean montane forests
C. ciliata	6.44333	-75.7286	Cauca Valley montane forests
C. ciliata	1.67153	-78.141	Chocó-Darién moist forests
C. ciliata	1.14806	-77.1752	Eastern Cordillera real montane forests
C. ciliata	1.83856	-76.7709	Eastern Cordillera real montane forests
C. ciliata	6.95675	-75.4136	Magdalena Valley montane forests
C. ciliata	4.75207	-76.2887	Northwestern Andean montane forests
C. cristalinensis	4.53056	-73.7589	Northern Andean páramo
C. diphylla	8.76944	-73.355	Cordillera Oriental montane forests
C. diphylla	2.93442	-75.281	Magdalena Valley dry forests
C. diphylla	6.3	-75.4833	Magdalena Valley montane forests
C. engelii	8.25533	-73.3505	Cordillera Oriental montane forests
C. fendleri	2.62786	-76.5001	Cauca Valley montane forests
C. fendleri	8.76944	-73.355	Cordillera Oriental montane forests
C. fendleri	1.15625	-76.756	Eastern Cordillera real montane forests
C. fendleri	2.93442	-75.281	Magdalena Valley dry forests
C. fendleri	7.63953	-73.3275	Magdalena Valley montane forests
C. fendleri	7.36603	-72.9171	Northern Andean páramo
C. juajibioyi	1.90058	-76.6663	Eastern Cordillera real montane forests
C. killipii	8.76944	-73.355	Cordillera Oriental montane forests
C. killipii	4.66841	-74.0297	Magdalena Valley montane forests
C. lehmannii	5.9	-75.3333	Cauca Valley montane forests
C. lehmannii	7.08333	-75.1667	Magdalena Valley montane forests
C. lehmannii	6.21667	-75.65	Magdalena Valley montane forests
C. lehmannii	6.80317	-76.2481	Northwestern Andean montane forests
C. longipetiolata	4.73333	-76.2667	Northwestern Andean montane forests
C. mandonii	4.33333	-74.25	Magdalena Valley montane forests
C. monophylla	2.40969	-76.4838	Cauca Valley montane forests
C. monophylla	5.24972	-76.1097	Northwestern Andean montane forests
C. muscosa	5.712	-75.3098	Cauca Valley montane forests
C. muscosa	4.85797	-73.2626	Cordillera Oriental montane forests
C. muscosa	4.82192	-76.1776	Northwestern Andean montane forests
C. neglecta	2.40075	-76.5009	Cauca Valley montane forests
C. neglecta	4.27744	-74.7721	Magdalena Valley dry forests
C. neglecta	4.78239	-74.1335	Magdalena Valley montane forests
C. nigrescens	2.368	-76.4479	Cauca Valley montane forests
C. nigrescens	10.5397	-73.0117	Cordillera Oriental montane forests
C. nigrescens	6.0916	-75.5572	Magdalena Valley montane forests
C. parvula	11.2158	-74.1629	Guajira-Barranquilla xeric scrub
C. parvula	4.72139	-74.0662	Magdalena Valley montane forests
C. parvula	6.74408	-76.3677	Northwestern Andean montane forests
C. pennelli	2.52803	-76.6638	Cauca Valley montane forests
C. pleioneura	4.96253	-75.5759	Cauca Valley montane forests
C. pleioneura	2.368	-76.4479	Cauca Valley montane forests
C. pleioneura	7.36664	-72.9167	Northern Andean páramo
C. pleioneura	0.814444	-77.8594	Northwestern Andean montane forests
C. polyantha	1.12972	-77.1493	Eastern Cordillera real montane forests
C. polyantha	3.80347	-74.9429	Magdalena Valley dry forests
C. polyantha	2.21381	-76.2	Magdalena Valley montane forests
C. polyantha	1.52083	-75.3744	Napo moist forests
C. polyblephara	2.44508	-76.6144	Cauca Valley montane forests
C. popay´┐Żnensis	2.40417	-76.5687	Cauca Valley montane forests
C. pseudomuscosa	5.08478	-73.3684	Cordillera Oriental montane forests
C. pseudomuscosa	10.4167	-72.8833	Cordillera Oriental montane forests
C. pseudomuscosa	7.20078	-72.3641	Cordillera Oriental montane forests
C. pseudomuscosa	7.37842	-72.6148	Cordillera Oriental montane forests
C. pseudomuscosa	1.90066	-76.6663	Eastern Cordillera real montane forests
C. pseudomuscosa	1.12975	-77.1493	Eastern Cordillera real montane forests
C. pseudomuscosa	6.3	-75.4833	Magdalena Valley montane forests
C. pseudomuscosa	5.85036	-73.5237	Magdalena Valley montane forests
C. pseudomuscosa	5.05047	-73.7728	Magdalena Valley montane forests
C. pseudomuscosa	5	-74.15	Magdalena Valley montane forests
C. pseudomuscosa	4.77936	-74.0205	Magdalena Valley montane forests
C. pseudomuscosa	4.66841	-74.0297	Magdalena Valley montane forests
C. pseudomuscosa	4.72764	-75.1319	Magdalena Valley montane forests
C. pseudomuscosa	7.12933	-73.6816	Magdalena-Urabá moist forests
C. pseudomuscosa	5.91813	-73.0733	Northern Andean páramo
C. pseudomuscosa	2.45258	-76.8113	Northwestern Andean montane forests
C. pulvinifera	1.19111	-76.9209	Eastern Cordillera real montane forests
C. queremalensis	3.52167	-76.7283	Northwestern Andean montane forests
C. rotundifolia	1.12975	-77.1493	Eastern Cordillera real montane forests
C. schlechteri	2.14227	-75.9124	Magdalena Valley montane forests
C. schlimii	3.61865	-76.1089	Cauca Valley montane forests
C. schultesii	7.28111	-72.5106	Cordillera Oriental montane forests
C. silvicola	5.73219	-73.1752	Magdalena Valley montane forests
C. silvicola	1.25472	-77.2497	Northwestern Andean montane forests
C. sp. 1	2.44597	-76.6138	Cauca Valley montane forests
C. stictophylla	2.62786	-76.5001	Cauca Valley montane forests
C. viereckii	5.53	-75.6782	Cauca Valley montane forests
C. viereckii	4.21539	-73.8151	Cordillera Oriental montane forests
C. viereckii	11.2321	-74.2174	Guajira-Barranquilla xeric scrub
C. viereckii	4.92181	-75.063	Magdalena Valley montane forests
C. viereckii	11.0845	-74.0832	Santa Marta montane forests
C. wageneri	3.54858	-76.5876	Cauca Valley montane forests
C. wageneri	5.73147	-73.2847	Magdalena Valley montane forests
C. wageneri	10.8248	-73.6934	Santa Marta páramo
C. zarucchii	6.50562	-75.9155	Cauca Valley montane forests
C. zarucchii	2.56586	-76.7869	Cauca Valley montane forests
C. zarucchii	4.83511	-75.6926	Cauca Valley montane forests
C. zarucchii	4.762	-73.6103	Cordillera Oriental montane forests
C. zarucchii	4.54358	-73.8982	Cordillera Oriental montane forests
C. zarucchii	11.1423	-74.1167	Guajira-Barranquilla xeric scrub
C. zarucchii	5.42	-75.15	Magdalena Valley montane forests
C. zarucchii	4.58333	-74.4333	Magdalena Valley montane forests
C. zarucchii	4.38839	-74.3246	Magdalena Valley montane forests
C. zarucchii	4.57694	-74.2942	Magdalena Valley montane forests
C. zarucchii	5.19997	-73.8667	Magdalena Valley montane forests
C. zarucchii	4.74083	-74.0838	Magdalena Valley montane forests
C. zarucchii	4.93389	-74.0001	Magdalena Valley montane forests
C. zarucchii	4.96578	-74.1574	Magdalena Valley montane forests
C. zarucchii	4.66841	-74.0297	Magdalena Valley montane forests
C. zarucchii	5.05933	-73.9771	Magdalena Valley montane forests
C. zarucchii	2.78528	-76.0239	Magdalena Valley montane forests
C. zarucchii	6.45	-76.22	Northwestern Andean montane forests
C. zarucchii	2.43333	-76.8	Northwestern Andean montane forests

## Sheet: Arkusz1
Species	Ecoregion
C. antioquiensis	Cauca Valley montane forests
C. barkleyi	Cauca Valley montane forests
C. betancurii	Cauca Valley montane forests
C. ciliata	Cauca Valley montane forests
C. fendleri	Cauca Valley montane forests
C. lehmannii	Cauca Valley montane forests
C. monophylla	Cauca Valley montane forests
C. muscosa	Cauca Valley montane forests
C. neglecta	Cauca Valley montane forests
C. nigrescens	Cauca Valley montane forests
C. pennelli	Cauca Valley montane forests
C. pleioneura	Cauca Valley montane forests
C. polyblephara	Cauca Valley montane forests
C. popayanensis	Cauca Valley montane forests
C. schlimii	Cauca Valley montane forests
C. sp. 1	Cauca Valley montane forests
C. stictophylla	Cauca Valley montane forests
C. viereckii	Cauca Valley montane forests
C. wageneri	Cauca Valley montane forests
C. zarucchii	Cauca Valley montane forests
C. callejasii	Chocó-Darién moist forests
C. ciliata	Chocó-Darién moist forests
C. antioquiensis	Cordillera Oriental montane forests
C. atrata	Cordillera Oriental montane forests
C. diphylla	Cordillera Oriental montane forests
C. engelii	Cordillera Oriental montane forests
C. fendleri	Cordillera Oriental montane forests
C. killipii	Cordillera Oriental montane forests
C. muscosa	Cordillera Oriental montane forests
C. nigrescens	Cordillera Oriental montane forests
C. pseudomuscosa	Cordillera Oriental montane forests
C. schultesii	Cordillera Oriental montane forests
C. viereckii	Cordillera Oriental montane forests
C. zarucchii	Cordillera Oriental montane forests
C. antioquiensis	Eastern Cordillera real montane forests
C. atrata	Eastern Cordillera real montane forests
C. calva	Eastern Cordillera real montane forests
C. ciliata	Eastern Cordillera real montane forests
C. fendleri	Eastern Cordillera real montane forests
C. juajibioyi	Eastern Cordillera real montane forests
C. polyantha	Eastern Cordillera real montane forests
C. pseudomuscosa	Eastern Cordillera real montane forests
C. pulvinifera	Eastern Cordillera real montane forests
C. rotundifolia	Eastern Cordillera real montane forests
C. parvula	Guajira-Barranquilla xeric scrub
C. viereckii	Guajira-Barranquilla xeric scrub
C. zarucchii	Guajira-Barranquilla xeric scrub
C. diphylla	Magdalena Valley dry forests
C. fendleri	Magdalena Valley dry forests
C. neglecta	Magdalena Valley dry forests
C. polyantha	Magdalena Valley dry forests
C. antioquiensis	Magdalena Valley montane forests
C. atrata	Magdalena Valley montane forests
C. badia	Magdalena Valley montane forests
C. barkleyi	Magdalena Valley montane forests
C. ciliata	Magdalena Valley montane forests
C. diphylla	Magdalena Valley montane forests
C. fendleri	Magdalena Valley montane forests
C. killipii	Magdalena Valley montane forests
C. lehmannii	Magdalena Valley montane forests
C. mandonii	Magdalena Valley montane forests
C. neglecta	Magdalena Valley montane forests
C. nigrescens	Magdalena Valley montane forests
C. parvula	Magdalena Valley montane forests
C. polyantha	Magdalena Valley montane forests
C. pseudomuscosa	Magdalena Valley montane forests
C. pseudomuscosa	Magdalena Valley montane forests
C. schlechteri	Magdalena Valley montane forests
C. silvicola	Magdalena Valley montane forests
C. viereckii	Magdalena Valley montane forests
C. wageneri	Magdalena Valley montane forests
C. zarucchii	Magdalena Valley montane forests
C. pseudomuscosa	Magdalena-Urabá moist forests
C. polyantha	Napo moist forests
C. antioquiensis	Northern Andean páramo
C. cristalinensis	Northern Andean páramo
C. fendleri	Northern Andean páramo
C. pleioneura	Northern Andean páramo
C. pseudomuscosa	Northern Andean páramo
C. antioquiensis	Northwestern Andean montane forests
C. atrata	Northwestern Andean montane forests
C. badia	Northwestern Andean montane forests
C. calva	Northwestern Andean montane forests
C. ciliata	Northwestern Andean montane forests
C. longipetiolata	Northwestern Andean montane forests
C. monophylla	Northwestern Andean montane forests
C. muscosa	Northwestern Andean montane forests
C. parvula	Northwestern Andean montane forests
C. pleioneura	Northwestern Andean montane forests
C. pseudomuscosa	Northwestern Andean montane forests
C. queremalensis	Northwestern Andean montane forests
C. silvicola	Northwestern Andean montane forests
C. zarucchii	Northwestern Andean montane forests
C. antioquiensis	Santa Marta montane forests
C. viereckii	Santa Marta montane forests
C. wageneri	Santa Marta páramo

## Sheet: Arkusz2
Ecoregion	Number of species
Cauca Valley montane forests	20
Chocó-Darién moist forests	2
Cordillera Oriental montane forests	12
Eastern Cordillera real montane forests	10
Guajira-Barranquilla xeric scrub	3
Magdalena Valley dry forests	4
Magdalena Valley montane forests	21
Magdalena-Urabá moist forests	1
Napo moist forests	1
Northern Andean páramo	5
Northwestern Andean montane forests	14
Santa Marta montane forests	2
Santa Marta páramo	1
