# Supplementary material for: Taxonomic revision of the genus Cranichis (Orchidaceae, Cranichideae) in Colombia
Source: PeerJ. 2019 Aug 9;7:e7385. doi: 10.7717/peerj.7385 (PMC6690379; doi:10.7717/peerj.7385)
Supplement: Supplemental Information 3 [file peerj-07-7385-s003.xls]

## Sheet: Arkusz1
Species	lector and number	Location
Cranichis antioquiensis	M. Madero 168	AMES
Cranichis antioquiensis	G. Huertas & L. Camargo 6266	COL
Cranichis antioquiensis	G. Huertas & L. Camargo 6283	COL
Cranichis antioquiensis	E. Killip & T. Hazen 11892	AMES
Cranichis antioquiensis	F. C. Lehmann 6327	NY
Cranichis antioquiensis	D. Correll Co512	AMES
Cranichis antioquiensis	F. Pennell & E. Killip 6644	AMES
Cranichis antioquiensis	F. Pennell & E. Killip 7329	AMES
Cranichis antioquiensis	J. lvarez et al. 37	COL
Cranichis antioquiensis	J.L. Fernandez Alonso et al. 12698	COL
Cranichis antioquiensis	J.L. Fernandez Alonso et al. 12700	COL
Cranichis antioquiensis	M. Acosta et al. 140	COL
Cranichis antioquiensis	M. Hernandez Schmidt 880	COL
Cranichis antioquiensis	M. Schneider 172/2	COL
Cranichis antioquiensis	L. Camargo & G. Huertes 1120	COL
Cranichis antioquiensis	A. Richter s.n.	COL
Cranichis antioquiensis	M. Ospina H. 1577	COL
Cranichis antioquiensis	M. Schneider 172/1	COL
Cranichis antioquiensis	T. van der Hammen 1099	COL
Cranichis antioquiensis	G. Lopez C. 96	COL
Cranichis antioquiensis	L. Uribe U. 5331	COL
Cranichis antioquiensis	J.A. Ewan 16196	AMES, US
Cranichis antioquiensis	L. Mora 2733	AMES
Cranichis antioquiensis	E. Killip & A. Smith 20172	AMES
Cranichis antioquiensis	M. Bristol 357	AMES
Cranichis antioquiensis	E. Killip & A. Smith 15571	AMES
Cranichis antioquiensis	I. Guarin O. 114	COL
Cranichis antioquiensis	W. Camp E-4999	AMES
Cranichis antioquiensis	C. Dodson et al. 18774	RPSC
Cranichis antioquiensis	C. Dodson 353	RPSC
Cranichis antioquiensis	A. Hirtz et al. 2495	RPSC
Cranichis atrata	E.P. Killip et al. 39868	US
Cranichis atrata	H. Rimann s.n.	W
Cranichis atrata	E. Killip & A.C. Smith 20643	AMES
Cranichis atrata	M. Ospina H. & J. Idrobo 146	AMES
Cranichis atrata	C. H. Dodson et al. 17035	RPSC
Cranichis atrata	N. Fassett 25804	AMES
Cranichis atrata	E.P. Killip & A.C. Smith 16730	AMES, US
Cranichis badia	M. Schneider 172/5	RENZ
Cranichis badia	Y. Figueroa-C., J. Mora & T. Vivas 867	COL
Cranichis badia	M. Schneider 11/1	COL
Cranichis badia	M. Schneider 253	COL
Cranichis badia	J. Ordonez et al. 1566	COL
Cranichis badia	F. C. Lehmann 8173	K
Cranichis badia	F. C. Lehmann 1 or s.n.	W
Cranichis badia	C. Dodson 98	RPSC
Cranichis badia	G. Harling et al. 8831	AMES
Cranichis badia	C. Dodosn & A. Hirtz 15816	RPSC
Cranichis badia	A. Hirtz et al. 2490	RPSC
Cranichis badia	D. Dallesandro 0390	RPSC
Cranichis badia	M. E. André 2222	K
Cranichis badia	H. G. Barclay & P. Juajibioy 9933	COL
Cranichis badia	O. Renz 6174	RENZ
Cranichis badia	O. Renz 6175	RENZ
Cranichis barkleyi	L. Valderrama & F. Barkley 18A215	AMES, US
Cranichis barkleyi	E.P. Killip 6791	AMES, NY, US
Cranichis barkleyi	J. Valencia et al. 1619	COL
Cranichis barkleyi	E. F. Andre 4508	K
Cranichis brevirostris	F. C. Lehmann 5885	K, RENZ
Cranichis brevirostris	O. Renz 4160	RENZ
Cranichis brevirostris	O. Renz 6156	RENZ
Cranichis callejasii	R. Callejas et al. 7757	MO, NY
Cranichis calva	F. C. Lehmann 476	W
Cranichis calva	O. de Benavides 9814	COL
Cranichis calva	J. Ordonez et al. 1735	COL
Cranichis calva	A. Weberbauer 6314	AMES
Cranichis ciliata	F. C. Lehmann 7258	AMES, NY
Cranichis ciliata	F. C. Lehmann 8155	AMES, NY
Cranichis ciliata	F. C. Lehmann 1	W
Cranichis ciliata	E.L. Core 1020	US
Cranichis ciliata	J.J. Triana 621	P, US
Cranichis ciliata	F. Silverstone-Sopkin et al. 3817	CUVC
Cranichis ciliata	G. Mandon 1163	W
Cranichis ciliata	J. Macbride 4045	W
Cranichis ciliata	A. Hirtz s.n.	RPSC
Cranichis ciliata	A. Hirtz 1335	RPSC
Cranichis ciliata	A. Hirtz 1593	RPSC
Cranichis ciliata	A. Hirtz 2583	RPSC
Cranichis ciliata	R. Spruce 5216	W
Cranichis ciliata	W. Jon s.n.	W
Cranichis ciliata	F. C. Lehmann 470	W
Cranichis ciliata	H. Karsten s.n.	W
Cranichis ciliata	A. Humboldt s.n.	W
Cranichis cristalinensis	H. Mendoza et al. 15473	COL, FMB
Cranichis cylindrostachys	B. MacBryde 579	AMES
Cranichis diphylla	O. Swartz s.n.	AMES, BM, W
Cranichis diphylla	R. Fonnegra et al. 5266	MO
Cranichis diphylla	H. Rby & F. Pennell 944	AMES
Cranichis diphylla	E. Killip & A. Smith 15946	AMES
Cranichis diphylla	E. Killip & A. Smith 16060	AMES
Cranichis diphylla	K. Cremers 7408	CAY, P
Cranichis diphylla	J. Hawkins 1812	MO
Cranichis diphylla	L. Williams & A. Alston 268	BM
Cranichis diphylla	F. C. Lehmann 1772 BM	BM
Cranichis diphylla	H. Harris 7555 BM	BM
Cranichis engelii	A. Bruchmuller s.n.	W
Cranichis engelii	G. Giraldo 66C-20	COL
Cranichis engelii	F. Engel s.n.	W
Cranichis fendleri	F. Pennell & E. Killip 7330	AMES
Cranichis fendleri	F. Pennell 7597a	AMES
Cranichis fendleri	H. Rby & F. Pennell 584	AMES
Cranichis fendleri	H. Rby & F. Pennell 944	AMES
Cranichis fendleri	F. Hermann 10924	AMES
Cranichis fendleri	L. Garay 58	AMES
Cranichis fendleri	E. Killip & A. Smith 18141	AMES
Cranichis fendleri	E. Killip & A. Smith 16149	AMES
Cranichis fendleri	K. Rahn 00306	C
Cranichis fendleri	A. Fendler 2135	AMES
Cranichis fendleri	H. Pittier 11281	AMES
Cranichis juajibioyi	H. G. Barclay & P. Juajibioy 5878	AMES, MO
Cranichis killipii	M. Schneider 172	COL
Cranichis killipii	E. Killip & A. Smith 16120	AMES
Cranichis killipii	D. Dalessandro 620	RPSC
Cranichis lehmannii	R. Callejas et al. 9899	NY
Cranichis lehmannii	R. Callejas et al. 8674	NY
Cranichis lehmannii	R. Callejas et al. 9541	NY
Cranichis lehmannii	J. L. Zarucchi & F. Roldan 7262	MO
Cranichis lehmannii	F. C. Lehmann 77	W
Cranichis longipetiolata	R. Arevalo et al. 787	COL
Cranichis longipetiolata	R. Ferreyra 3120	AMES
Cranichis longipetiolata	A. Hirtz 2651	RPSC
Cranichis mandonii	Y. Figueroa et al. 880	COL
Cranichis mandonii	G. Mandon 1163	AMES
Cranichis monophylla	F. Pennell & E. Killip 6470b	AMES
Cranichis monophylla	Arévalo et al. 657	COL
Cranichis monophylla	J. Moritz 1107	W
Cranichis monophylla	J. Linden s.n.	K
Cranichis muscosa	L. Garay & H. Sweet 1057	AMES
Cranichis muscosa	J. Betancur 8748	COL
Cranichis muscosa	C. Wright 620 & s.n.	W
Cranichis muscosa	E. Poeppig s.n.	W
Cranichis muscosa	L. Hahn 90	W
Cranichis muscosa	W. Morris s.n.	W
Cranichis muscosa	O. Swartz s.n.	BM, W
Cranichis neglecta	F. Pennell & E. Killip 6470	AMES
Cranichis neglecta	F. Pennell 2367	NY
Cranichis neglecta	F. C. Lehmann BT71	NY
Cranichis nigrescens	M. Ospina H. 60	AMES
Cranichis nigrescens	F.W. Pennell & E.P. Killip 6595	AMES, NY
Cranichis nigrescens	J. Cuatrecasas & R. Romero-Castaneda 25188	US
Cranichis nigrescens	A. Tonduz s.n.	AMES
Cranichis ovatilabia	M. Madero s.n.	AMES
Cranichis parvula	G. McPherson 13411	MO
Cranichis parvula	J. Ordóñez et al. 1782	COL
Cranichis parvula	H.H. Smith 2553	US
Cranichis parvula	J. Steyermark 121599	MO
Cranichis pennelli	F.W. Pennell 7469	AMES, NY, US
Cranichis picta	W. Jon s.n.	AMES, W
Cranichis pleioneura	F.W. Pennell 9400	AMES, NY, US
Cranichis pleioneura	L.A. Garay 15	AMES
Cranichis pleioneura	W. Drew E-482	AMES
Cranichis pleioneura	E.P. Killip & A.C. Smith 18790	AMES, NY, US
Cranichis polyantha	O. Renz 4126	AMES
Cranichis polyantha	M. Madero 22	AMES
Cranichis polyantha	Fernandez P. 5882	COL
Cranichis polyantha	O. de Benavides 9814	COL
Cranichis polyantha	M. Schneider 615	COL
Cranichis polyantha	W. Hodge 6137	AMES
Cranichis polyantha	A. Hirtz 2156	RPSC
Cranichis polyantha	C. Dodson 221	RPSC
Cranichis polyantha	A. Hirtz et al. 2343	RPSC
Cranichis polyantha	A. Hirtz 2421	RPSC
Cranichis polyblephara	F. C. Lehmann 2812	BM
Cranichis popayanensis	L. de Escobar et al. 4257	MO
Cranichis pseudomuscosa	R. Fonnegra et al. 5334	COL, MO
Cranichis pseudomuscosa	J.L. Fernandez Alonso et al. 12084	COL
Cranichis pseudomuscosa	H. Dueñas et al. s.n.	COL
Cranichis pseudomuscosa	H. Dueñas 3088	COL
Cranichis pseudomuscosa	H. G. Barclay & P. Juajibioy 5818	COL
Cranichis pseudomuscosa	J. M. Idrobo et al. 3963	COL
Cranichis pseudomuscosa	F. Gonzalez et al. et al. 2928	COL
Cranichis pseudomuscosa	O. Rangel et al. 11078	COL
Cranichis pseudomuscosa	M.P. Cordoba et al. 3006	COL
Cranichis pseudomuscosa	M. Hernandez Schmidt 357	COL
Cranichis pseudomuscosa	M. Hernandez Schmidt 374	COL
Cranichis pseudomuscosa	M. Hernandez Schmidt 1032	COL
Cranichis pseudomuscosa	M. Schneider 250/2	COL
Cranichis pseudomuscosa	M. Schneider 250/3	COL
Cranichis pseudomuscosa	M. Schneider 250/4	COL
Cranichis pseudomuscosa	M. Schneider 250/1	COL
Cranichis pseudomuscosa	O. de Benavides & B.R. Ramirez 4976	COL
Cranichis pseudomuscosa	J.L. Fernandez Alonso et al. 11774	COL
Cranichis pseudomuscosa	M.T. Murillo & R. Jaramillo M. 1297	COL
Cranichis pseudomuscosa	S. Díaz P. 1641	COL
Cranichis pseudomuscosa	J.M. Idrobo et al. 10315	COL
Cranichis pseudomuscosa	W. Camp E-4065	AMES
Cranichis pseudomuscosa	C. Ceron & R. Alarcon 3530	RPSC
Cranichis pseudomuscosa	H. Barclay & P. Juajibioy 9933	AMES
Cranichis pulvinifera	M. Bristol 1227	AMES
Cranichis pulvinifera	D. Dalessandro 623	RPSC
Cranichis pulvinifera	C. Luer et al. 498	RPSC
Cranichis queremalensis	M.F. Gonzalez et al. 168	COL
Cranichis roldanii	J. Betancur et al. 1042	MO
Cranichis rotundifolia	O. S. Benavides 2699	PSO
Cranichis schlechteri	S. Díaz P. et al. 745	COL
Cranichis schlimii	S. Sarria et al. 1422	CUVC
Cranichis schlimii	D. Funck & L. J. Schlim 1238	W
Cranichis schultesii	J. Cuatrecasas et al. 12169a	AMES
Cranichis silvicola	M. Cordoba et al. 3143	COL
Cranichis silvicola	F. C. Lehmann 8505	K, RENZ
Cranichis silvicola	C. Sheviak et al. CS825	AMES
Cranichis silvicola	O. Renz 6141	RENZ
Cranichis sp. 1	F. C. Lehmann 944	W
Cranichis stictophylla	F.W. Pennell 7597	AMES, NY
Cranichis stictophylla	P. Hutchison & J. Wright 5792	AMES
Cranichis tenuiflora	C. Wright 3292	AMES, P
Cranichis tenuis	C. Wright 1478	AMES, P, W
Cranichis viereckii	J. Betancur et al. 1096	MO
Cranichis viereckii	M. Schneider 418	AMES
Cranichis viereckii	H.H. Smith 2845	NY
Cranichis viereckii	L. Viereck s.n.	AMES, US
Cranichis viereckii	F.W. Pennell 3300	NY
Cranichis viereckii	M.T. Madison 3847	RPSC
Cranichis wageneri	M.P. Cordoba et al. 3122	COL
Cranichis wageneri	M.P. Cordoba et al. 3143	COL
Cranichis wageneri	J. Cuatrecasas & R. Romero Castaneda 24743	COL, US
Cranichis wageneri	E. Parra s.n.	VALLE
Cranichis wageneri	M. Wagener s.n.	AMES, W
Cranichis zarucchii	J. L. Zarucchi et al. 5177	COL, MO, NY
Cranichis zarucchii	G. Lozano C. & J. Rivera 2211	COL
Cranichis zarucchii	J. L. Zarucchi et al. 5694	COL, K, MO
Cranichis zarucchii	J. Correa & F. Barkley 18A198	AMES, US
Cranichis zarucchii	E.L. Munoz E. et al. 1602	COL
Cranichis zarucchii	R. Javier 13	COL
Cranichis zarucchii	J. Vera et al. 40	COL
Cranichis zarucchii	F. Sarmiento 2152	COL
Cranichis zarucchii	A. Chaparro de Barrera & E. Barrera Torres 224	COL
Cranichis zarucchii	A. Chaparro de Barrera & E. Barrera Torres 317	COL
Cranichis zarucchii	L. Uribe U. 5451	COL
Cranichis zarucchii	T. van der Hammen 7153	COL
Cranichis zarucchii	E. Forero & R. Jaramillo 49	COL
Cranichis zarucchii	C. Saravia T. & H. Torres R. 3188	COL
Cranichis zarucchii	C. Saravia T. & R. Restrepo M. 3144	COL
Cranichis zarucchii	M. Acosta et al. 160	COL
Cranichis zarucchii	M. Ospina H. & J.M. Idrobo 44	AMES, COL
Cranichis zarucchii	M. Schneider 11/2	COL
Cranichis zarucchii	M. Schneider 11/3	COL
Cranichis zarucchii	M. Schneider 11/1 p.p.	COL
Cranichis zarucchii	J. Cuatrecasas 5425	COL
Cranichis zarucchii	Bro Ariste-Joseph A404	US
Cranichis zarucchii	B. Cesar 9652	COL
Cranichis zarucchii	J.H. Torres & P. Pinto 2950	COL
Cranichis zarucchii	R. Bernal et al. 1648	COL
Ocampoa asplundii	E. Asplund 9553	AMES
Ocampoa stenopetala	Folsom s.n.	MO
